# Supplementary material for: Cu and Co nanoparticle-Co-decorated N-doped graphene nanosheets: a high efficiency bifunctional electrocatalyst for rechargeable Zn–air batteries
Source: Royal Society of Chemistry journal article supplement (doi:10.1039/c9ta02894c), 2019-01-01
Supplement: c9ta02894c1.pdf [file c9ta02894c1.pdf]

## **Cu and Co Nanoparticle Co-decorated N-doped Graphene Nanosheets: A High Efficiency Bifunctional Electrocatalyst for Rechargeable Zn-Air Batteries**

Peitao Liu<sup>a‡</sup>, Yating Hu<sup>b‡</sup>, Xiaokai Liu<sup>a</sup>, Tongtong Wang<sup>a</sup>, Pinxian Xi<sup>c</sup>, Shibo Xi<sup>d</sup>, Daqiang Gao<sup>a\*</sup> and John Wang<sup>b\*</sup>.

<sup>a</sup>P. Liu, X. Liu, T. Wang, Prof. D. Gao

Key Laboratory for Magnetism and Magnetic Materials of MOE, Key Laboratory of Special Function Materials and Structure Design of MOE, Lanzhou University, Lanzhou 730000, P. R. China  
Email: gaodq@lzu.edu.cn

<sup>b</sup>Y. Hu, Prof. J. Wang

Department of Material Science and Engineering, National University of Singapore, Engineering Drive 3, 117575, Singapore  
Email: msewangj@nus.edu.sg

<sup>c</sup>Prof. P. Xi

Key Laboratory of Nonferrous Metal Chemistry and Resources Utilization of Gansu Province and The Research Center of Biomedical Nanotechnology, Lanzhou University, Lanzhou, 730000, P. R. China

<sup>d</sup>Dr. S. Xi

Institute of Chemical and Engineering Sciences, A\*STAR, 1 Pesek Road, Jurong Island, 627833, Singapore

<sup>‡</sup> These two authors contribution equal to this work.

## Experimental Section

*Preparation of CuCo@N-C, Co@N-C and Cu@N-C:* In a typical procedure, 0.01 mol  $\text{CoCl}_2 \cdot 6\text{H}_2\text{O}$ , 0.01 mol  $\text{CuCl}_2 \cdot 2\text{H}_2\text{O}$  and 4 g  $\text{C}_2\text{H}_4\text{N}_4$  were dissolved in 30 ml ethanol under vigorously stirring. After that, the homogeneous miscible liquid was transferred into an oven at 90 °C for overnight. The precursor after dry was thermally treated at 800 °C in an argon atmosphere for 3 h. For comparison, Co@N-C and Cu@N-C were synthesized by the same method, but excluding Cu source or Co source in the process. N-C was also prepared by the same method, but excluding Cu and Co source added in the process.

*Materials Characterizations:* X-ray diffractometer (XRD) patterns were collected by using a Rigaku D/Max-2400 diffractometer with Cu K $\alpha$  radiation ( $\lambda = 1.54178 \text{ \AA}$ ). Transmission electron microscopy (TEM) studies were performed on Tecnai G2 F30 Field Emission Transmission Electron Microscope. The chemical states and bonding characteristics were analyzed by X-ray photoelectron spectroscopy (XPS; Kratos AXIS Ultra). Raman spectrum was measured on a Jobin-Yvon HR80 spectrometer at room temperature.  $\text{N}_2$  adsorption/desorption isotherms were collected at 80 °C by using a Micromeritics ASAP 2020 V403. X-ray absorption near edge structures (XANES) and extended X-ray absorption fine structures (EXAFS) were measured in the vicinity of the Co and Cu K edge at the XAFCA beamline of the Singapore Synchrotron Light Source (SSLS), Singapore.

*Calculation details:* We used a computational code of Vienna *ab initio* simulation package (VASP) for DFT calculations. The standard generalized-gradient

approximation (GGA) was adopted for the exchange-correlation potential. The energy cutoff of the plane waves used for expanding electronic wave functions is 400 eV. A Monkhorst–Pack k-point mesh of 4×4×4 was used for geometry optimization and electronic property calculations. Both atomic positions and cell parameters were optimized until the residual forces were below 0.01 eV/Å.

*Electrochemical Measurements:* The OER and ORR electrochemical process were recorded at room temperature ( $25 \pm 0.5$  °C) on a CHI 760e Electrochemical Workstation (CHI Instruments, Shanghai Chenhua Instrument Corporation, China) with three-electrode system: as-prepared samples on a Platinum carbon electrode or a rotating ring-disk electrode (RRDE) used as the working electrode, a saturated Ag/AgCl reference electrode and a platinum-foil counter electrode. The measured potentials (vs Ag/AgCl) in this work were converted to a reversible hydrogen electrode (RHE) and iR corrected according to the Nernst equation ( $E_{\text{RHE}} = E_{\text{Ag/AgCl}} + 0.197 + 0.059 \text{ pH}$ ). As for the ORR, the catalytic ink was prepared by homogeneously dispersed 3 mg catalysts in 1470  $\mu\text{L}$  N,N-Dimethylformamide (DMF) and 30  $\mu\text{L}$  Nafion. Then, the catalytic ink was dropped onto the rotating disk working electrode (RDE) at a loading amount of 0.2 mg/cm<sup>2</sup> and dried at room temperature. All the ORR properties were tested on RRDE at 1600 rpm in O<sub>2</sub>-saturated 0.1 M KOH solution with the varied rotating speeds.

*Zn-Air Batteries test:* A home-made rechargeable ZABs was assembled using polished zinc plate as the anode, a carbon fiber paper (CFP) with the catalyst (loading amount of 2 mg cm<sup>-2</sup>) as air cathode and 6 M KOH with 0.2 M zinc acetate solution as

electrolyte according to the previous work. As for micro-solid-state ZABs were assembled with CuCo@N-C as air cathode, polished Zn plate as an anode and alkaline hydrogel polymer as the electrolyte. The battery performance was recorded on a potentiostat (CHI 760E, CH Instrument Co.) and LAND testing system. For comparison, the 20 wt% Pt/C based ZAB was also studied under the same conditions.

### Calculation of electron transferred number (n) for ORR

The number of electron transfer per O<sub>2</sub> participate in oxygen reduction can be determined by Koutechy-Levich equation:

$$1/j = 1/j_k + 1/B\omega^{1/2} \quad (5)$$

where  $j_k$  is the kinetic current and  $\omega$  is the electrode rotating rate.  $B$  is determined from the slope of the Koutechy-Levich (K-L) plots based on the Levich equation below:

$$B = 0.2nF(D^{O_2})^{2/3}\nu^{-1/6}C^{O_2} \quad (6)$$

where  $n$  represents the transferred electron number per oxygen molecule.  $F$  is Faraday constant ( $F = 96485 \text{ C mol}^{-1}$ ).  $D^{O_2}$  is the diffusion coefficient of O<sub>2</sub> in 0.1 M KOH ( $D^{O_2} = 1.9 \times 10^{-5} \text{ cm}^2 \text{ s}^{-1}$ ).  $\nu$  is the kinetic viscosity ( $\nu = 0.01 \text{ cm}^2 \text{ s}^{-1}$ ).  $C^{O_2}$  is the bulk concentration of O<sub>2</sub> ( $C^{O_2} = 1.2 \times 10^{-6} \text{ mol cm}^{-3}$ ). The constant 0.2 is adopted when the rotation speed is expressed in rpm.

For the Rotating Ring-Disk Electrodes measurements, the %<sup>HO</sup><sub>2</sub><sup>-</sup> and transfer number ( $n$ ) were determined by the followed equations:

$$\%^{HO} \text{O}_2^- = \frac{I_r/N}{200I_d + I_r/N} \quad (7)$$

$$n = \frac{I_d}{4I_d + I_r/N}$$

(8)

where  $I_d$  is disk current,  $I_r$  is ring current and  $N$  is current collection efficiency of the Pt ring.  $N$  was determined to be 0.40.

### **Calculation of specific capacity and energy density for Zn-air batteries**

The specific capacity was calculated by the equation below:

$$\text{Specific Capacity} = I \times t / m_{Zn} \quad (9)$$

The energy density was calculated by the equation below:

$$\text{Energy Density} = I \times t \times V / m_{Zn} \quad (10)$$

Where  $I$  denotes Current,  $t$  denotes the service hours,  $V$  denotes the average discharge voltage, and  $m_{Zn}$  denotes the weight of consumed zinc.

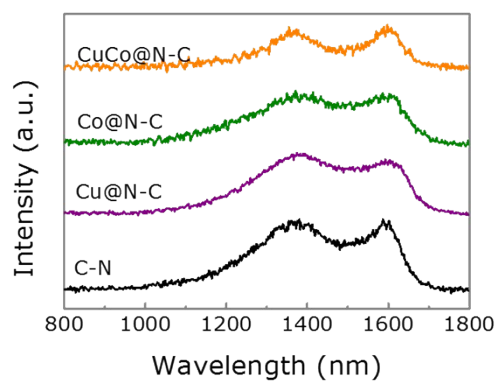

**Figure S1.** The Raman spectra of catalysts CuCo@N-C, Co@N-C, Cu@N-C and N-C.

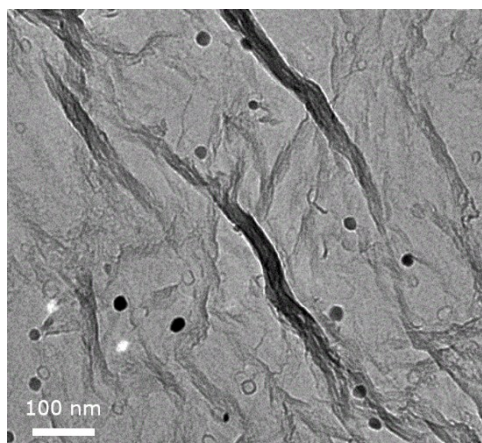

**Figure S2.** TEM image of catalyst CuCo@N-C.

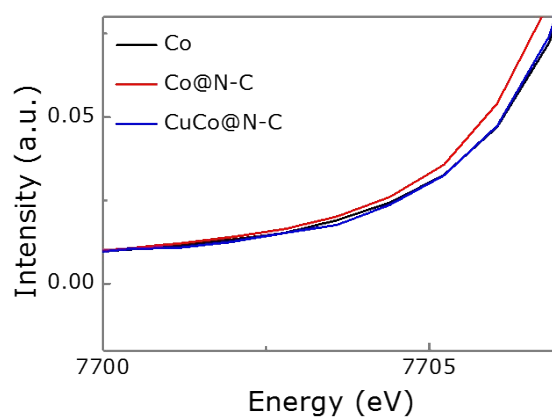

**Figure S3.** XANES spectrum of Co foil, Co@N-C and CuCo@N-C.

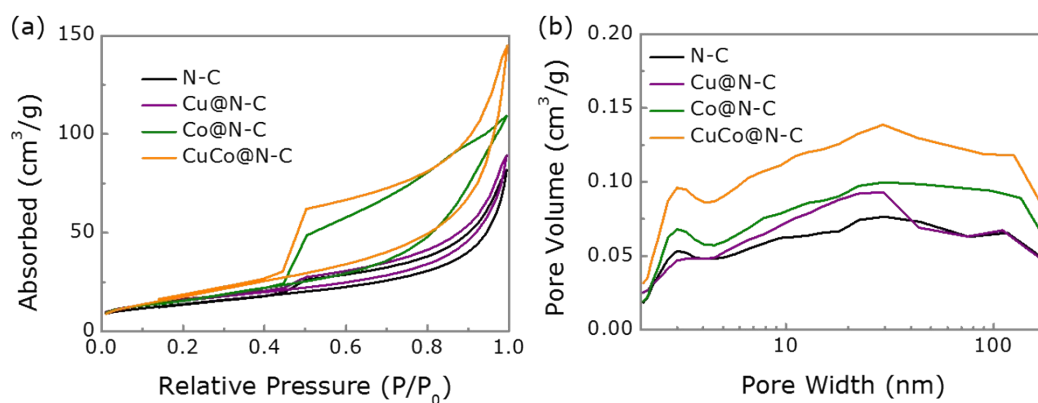

**Figure S4.** (a) BET plots and (b) pore width of CuCo@N-C, Co@N-C, Cu@N-C and N-C.

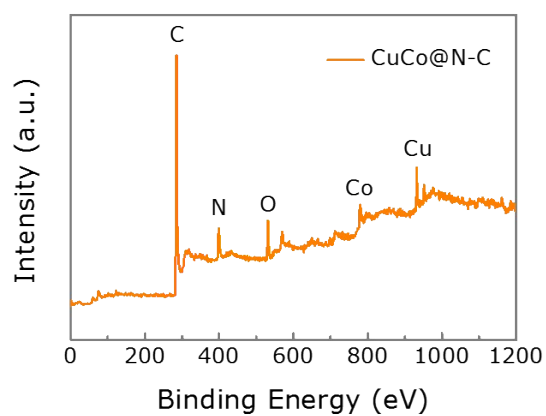

**Figure S5.** The XPS spectrum of CuCo@N-C.

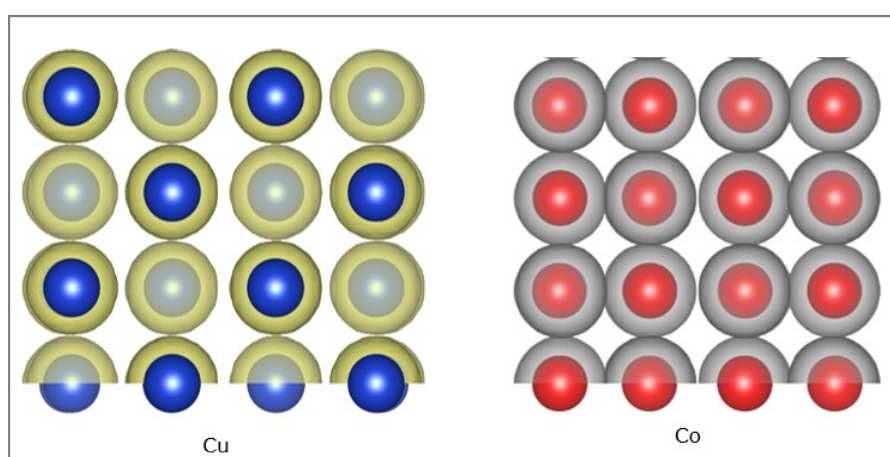

**Figure S6.** The charge density of Cu and Co with the isosurface value of  $0.05 \text{ e/bohr}^3$ .

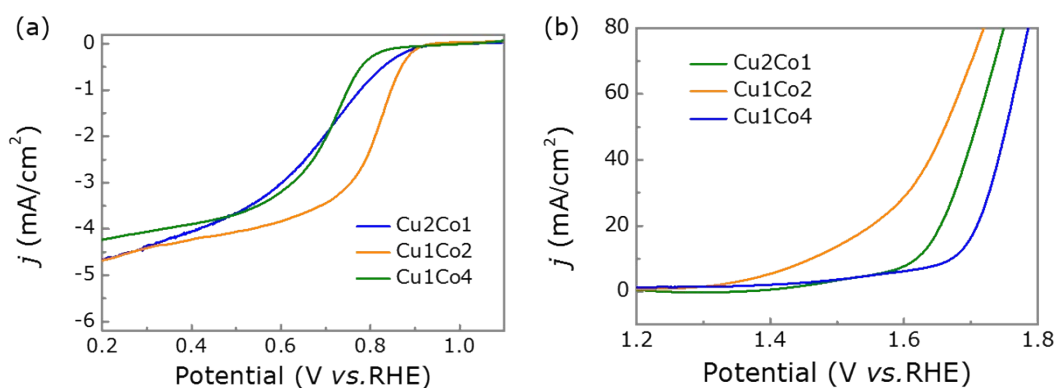

**Figure S7.** (a) LSV polarization curves of ORR for all the catalysts (Cu : Co= 2 : 1, 1 : 2 and 1 : 4, respectively.) at 1600 rpm. (b) LSV polarization curves of OER for all the catalysts (Cu : Co= 2 : 1, 1 : 2 and 1 : 4, respectively.).

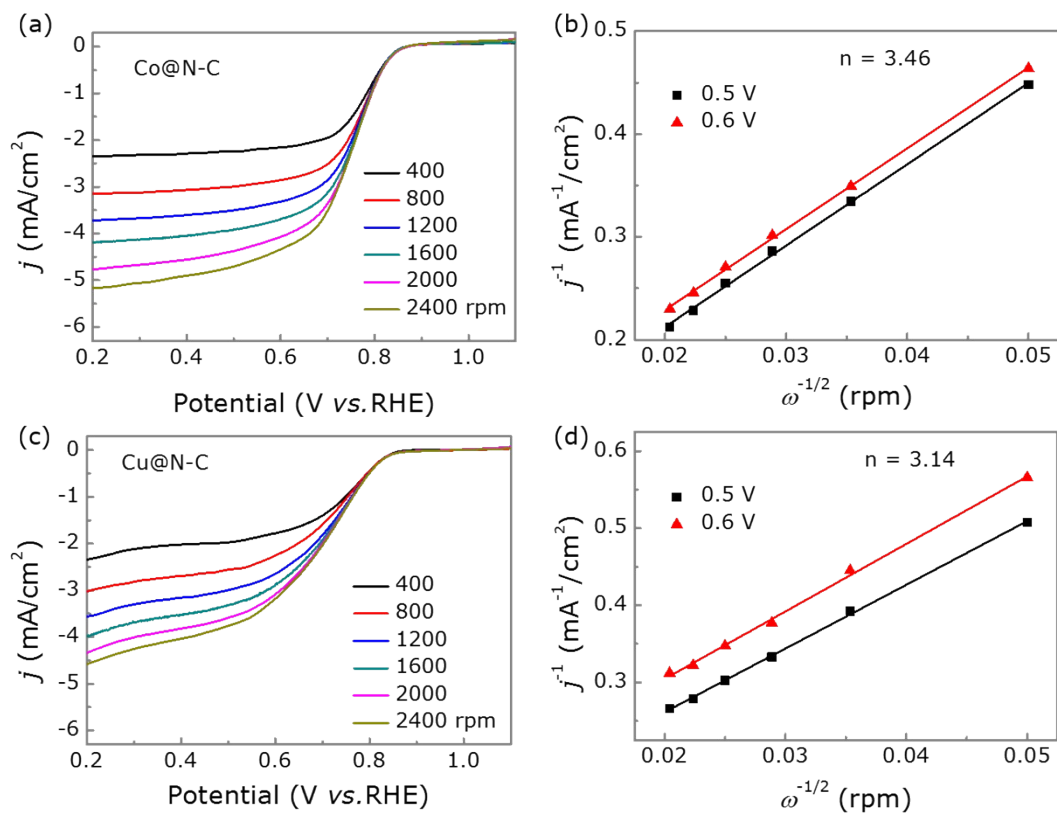

**Figure S8.** (a) LSV curves of ORR for Co@N-C at different rotation speeds and (b) the corresponding Koutecky–Levich plots. (c) LSV curves of ORR for Cu@N-C at different rotation speeds and (d) the corresponding Koutecky–Levich plots.

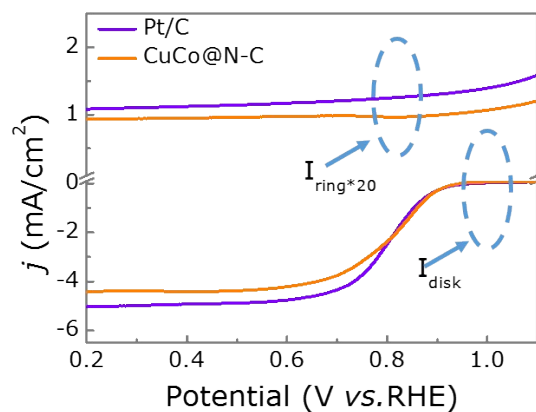

**Figure S9.** The RRDE curves for CuCo@N-C and Pt/C in O<sub>2</sub> saturated 0.1 M KOH at 1600 rpm.

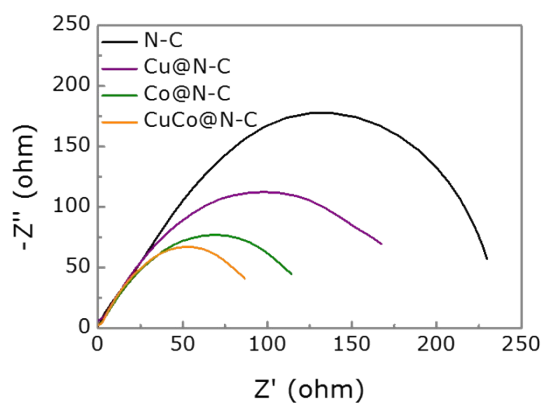

**Figure S10.** EIS cruves of catalysts CuCo@N-C, Co@N-C, Cu@N-C and N-C.

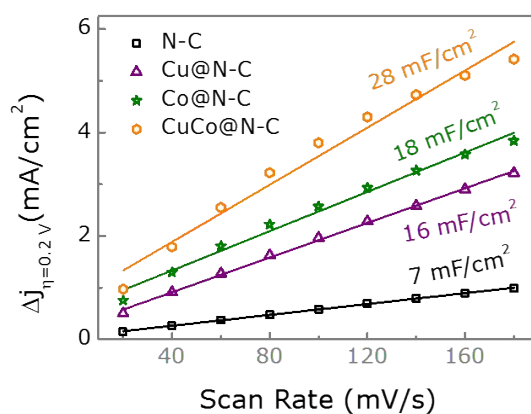

**Figure S11.** ECSA results of catalysts CuCo@N-C, Co@N-C, Cu@N-C and N-C.

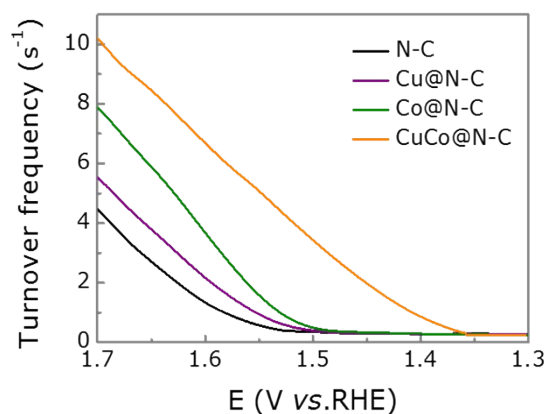

**Figure S12.** TOF results of catalysts CuCo@N-C, Co@N-C, Cu@N-C and N-C.

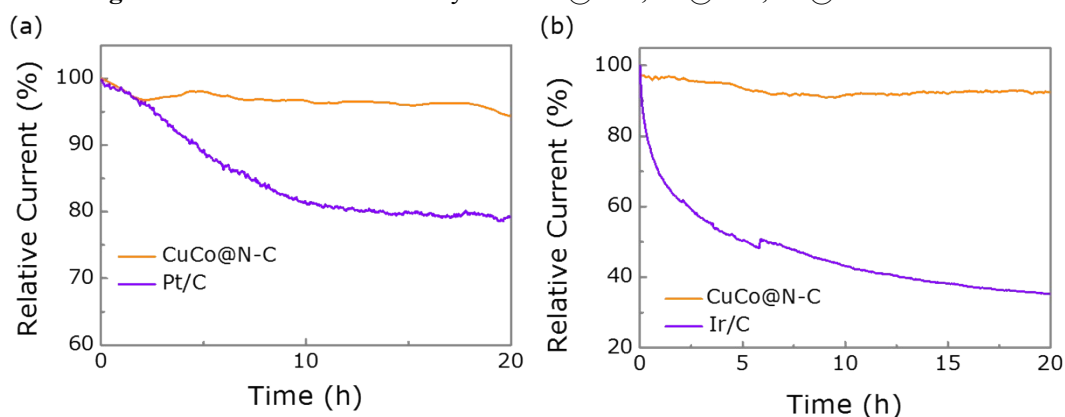

**Figure S13.** (a) The chronopotentiometric response of ORR for catalyst CuCo@N-C and Pt/C (20%) at a constant voltage of 0.7 V vs. RHE. (b) The chronopotentiometric response of OER for CuCo@N-C and Ir/C (20%) at a constant voltage of 1.50 V vs. RHE.

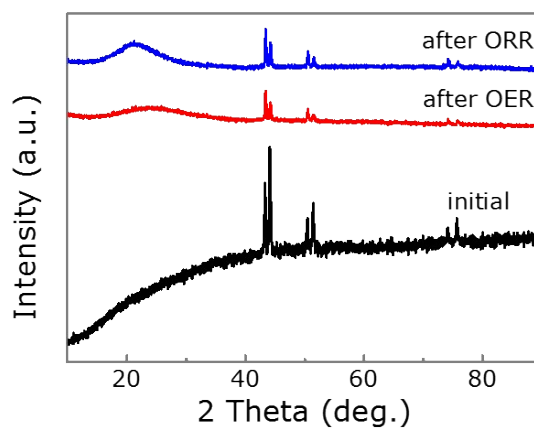

**Figure S14.** XRD results of CuCo@N-C after the stability test.

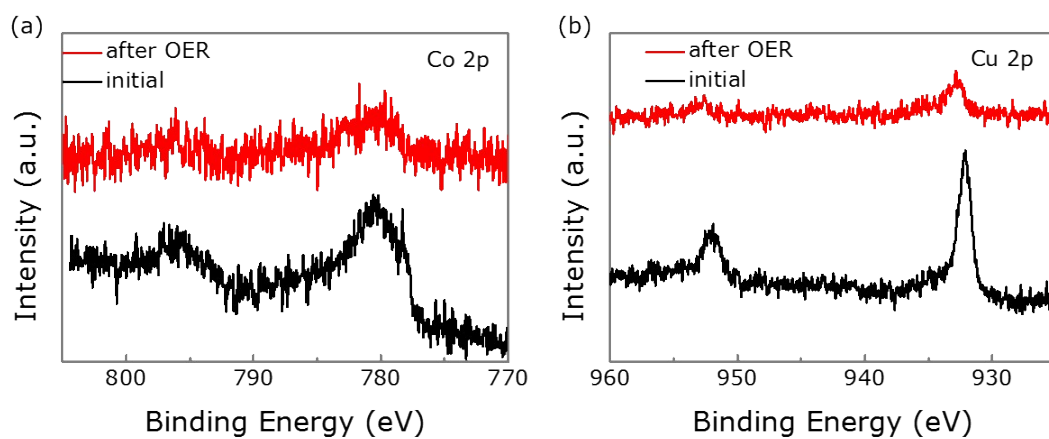

**Figure S15.** XPS results of CuCo@N-C after the OER test.

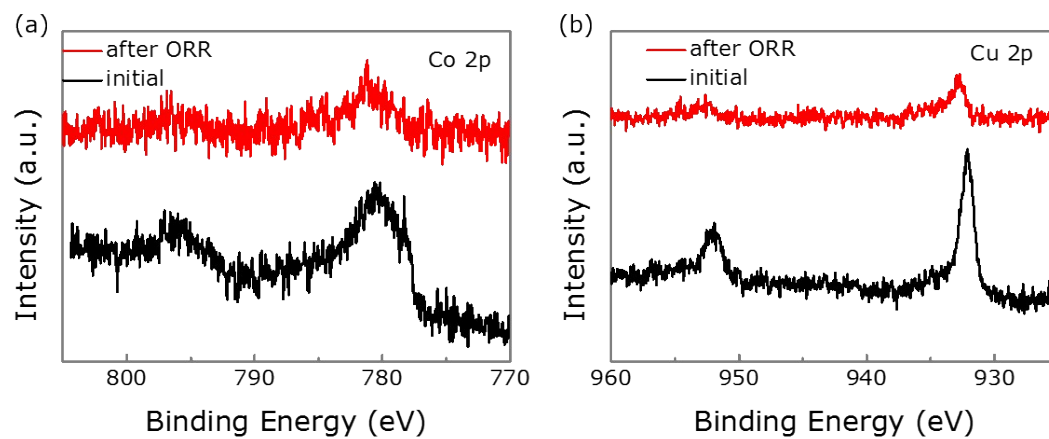

**Figure S16.** XPS results of CuCo@N-C after the ORR test.

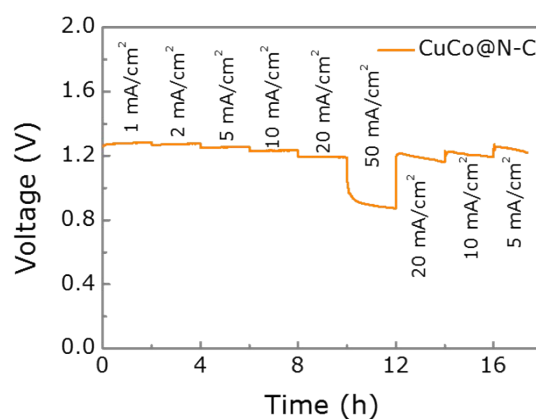

**Figure S17.** Discharge curves of the CuCo@N-C based ZABs at different current densities.

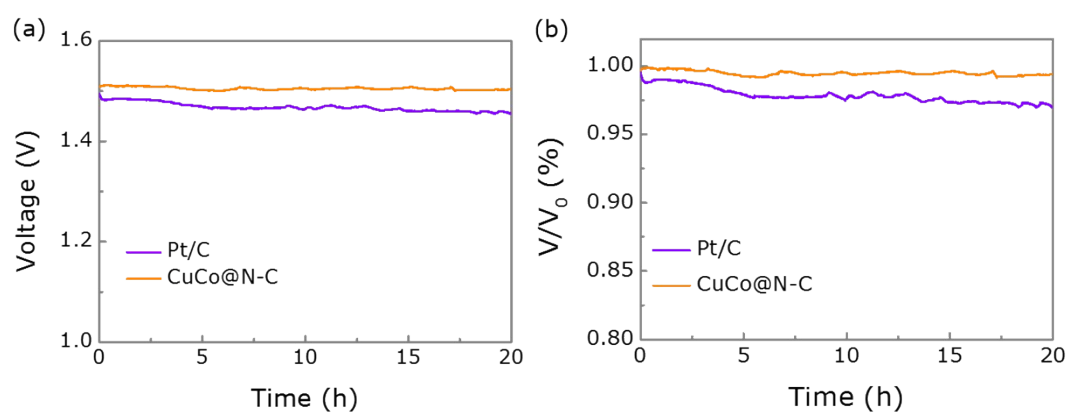

**Figure S18.** (a) The Open circuit voltage of Pt/C and CuCo@N-C. (b) The percentage of  $V/V_0$  for Pt/C and CuCo@N-C.

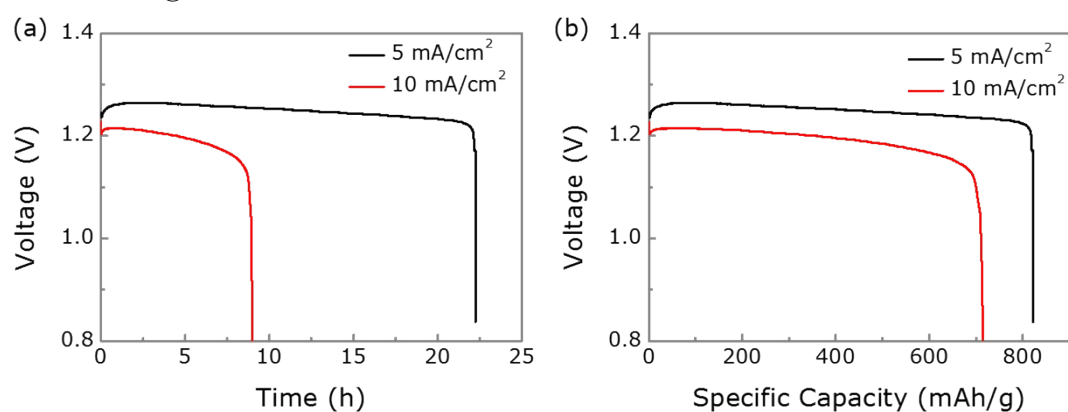

**Figure S19.** (a) Discharge curves at the current density of 5 mA/cm<sup>2</sup>, 10 mA/cm<sup>2</sup> and (d) the corresponding specific capacities of the CuCo@N-C based battery, respectively.

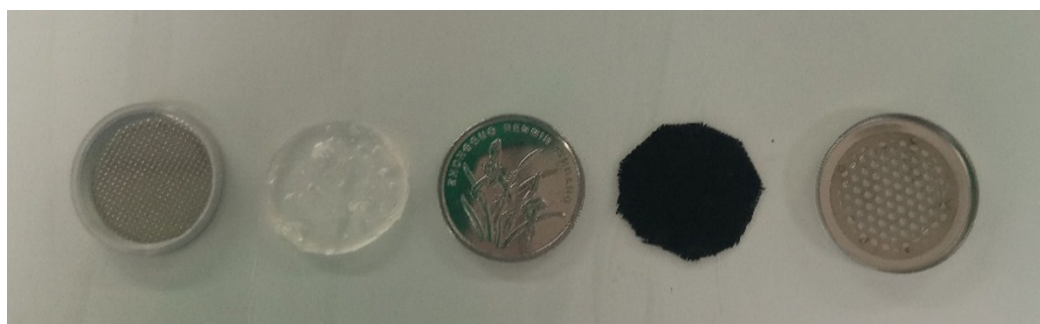

**Figure S20.** Schematic representation of the micro-solid-like ZABs based on CuCo@N-C air cathode.

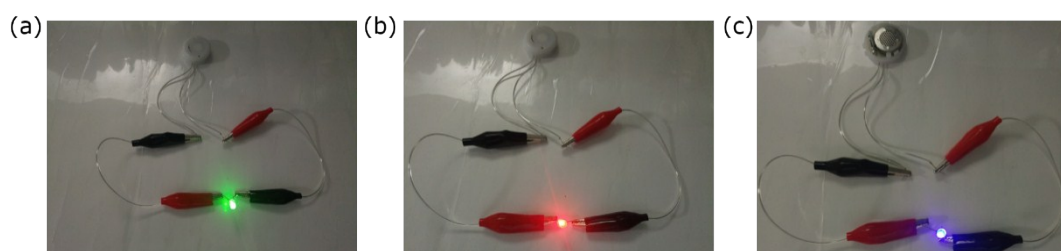

**Figure S21.** (a), (b) and (c) The photograph of a blue, green and red LED powered by two tandem all-solid-state ZABs.

**Table S1.** The  $E$  ( $E = E_{j=10} - E_{1/2}$ ) value of our work and others comparison with CuCo compounds (oxides, hydroxides, nitrides, phosphides) catalysts.

| Catalysts                             | $E_{j=10}/V$<br>(10 mA/cm <sup>2</sup> ) | $E_{1/2}/V$ | $E/V$<br>( $E_{j=10} - E_{1/2}$ ) | Ref.      |
|---------------------------------------|------------------------------------------|-------------|-----------------------------------|-----------|
| N-C                                   | 1.71                                     | 0.60        | 1.11                              | This work |
| Cu@N-C                                | 1.68                                     | 0.69        | 0.99                              | This work |
| Co@N-C                                | 1.65                                     | 0.75        | 0.90                              | This work |
| CuCo@N-C                              | 1.46                                     | 0.81        | 0.65                              | This work |
| 50% Pt/C + 50% Ir/C                   | 1.56                                     | 0.78        | 0.78                              | This work |
| CuCo <sub>2</sub> O <sub>4</sub> @C   | 1.56                                     | ~           | ~                                 | 1         |
| CuCo <sub>2</sub> O <sub>4</sub> -SSM | ~                                        | 0.80        | ~                                 | 2         |
| Co <sub>3</sub> O <sub>4</sub> @C-    | 1.55                                     | 0.81        | 0.74                              | 3         |
| MWCNTS                                |                                          |             |                                   |           |
| Co <sub>3</sub> O <sub>4</sub> /NRGO  | 1.65                                     | 0.82        | 0.83                              | 4         |
| Co-N <sub>x</sub> /C NRA              | 1.53                                     | 0.88        | 0.65                              | 5         |
| Co <sub>2</sub> P@NPC                 | 1.56                                     | 0.83        | 0.73                              | 6         |
| Co <sub>3</sub> ZnC/Co                | 1.60                                     | 0.81        | 0.79                              | 7         |
| Cu@CoFe                               | 1.47                                     | ~           | ~                                 | 8         |
| Co@Co <sub>3</sub> O <sub>4</sub> /NC | 1.65                                     | 0.80        | 0.85                              | 9         |
| (Ni, Co)/CNT                          | 1.43                                     | 0.74        | 0.69                              | 10        |
| Cu <sub>2</sub> O-Cu                  | 1.48                                     | ~           | ~                                 | 11        |
| CoNC-CNF-1000                         | 1.68                                     | 0.80        | 0.88                              | 12        |
| Co-NC@CoP-NC                          | 1.47                                     | 0.78        | 0.69                              | 13        |

**Table S2.** Comparison of the performances of ZABs of our work and other recently reported catalysts.

| Catalysts                                | Electrolyte                            | Open-circuit potential (V) | Power density (mW/cm <sup>2</sup> ) | Ref.     |
|------------------------------------------|----------------------------------------|----------------------------|-------------------------------------|----------|
| Pt/C                                     | 6.0 M KOH                              | 1.48                       | 165                                 | The work |
| CuCo@N-C                                 | 6.0 M KOH                              | 1.51                       | 170                                 | The work |
| CoIn <sub>2</sub> S <sub>4</sub> /S-rGO  | 6.0 M KOH + 0.2 M ZnCl <sub>2</sub>    | 1.42                       | 133                                 | 14       |
| Fe@C-NG/NCNTs                            | 6.0 M KOH                              | 1.37                       | 101                                 | 15       |
| FeN <sub>x</sub> /C-700-20               | 6.0 M KOH                              | ~                          | 36                                  | 16       |
| CoFe/N-GCT                               | ~                                      | 1.43                       | 203                                 | 17       |
| LaMnO <sub>3+δ</sub>                     | 6.0 M KOH                              | 1.43                       | 199                                 | 18       |
| N,P-NC-1000                              | 6.0 M KOH                              | 1.48                       | 146                                 | 19       |
| CFZr(0.3)/rGO                            | 6.0 M KOH                              | 1.39                       | ~                                   | 20       |
| Ni <sub>3</sub> Fe/N-S-CNTs              | 6.0 M KOH                              | ~                          | 180                                 | 21       |
| FeNi-NC                                  | 6.0 M KOH + 0.2 M ZnO                  | ~                          | 81                                  | 22       |
| CoNiFe-S MNS                             | 6.0 M KOH + 0.2 M ZnCl <sub>2</sub>    | ~                          | 140                                 | 23       |
| FeS/Fe <sub>3</sub> C@N-S-C-800          | 6.0 M KOH + 0.2 M Zn(Ac) <sub>2</sub>  | 1.43                       | 65                                  | 24       |
| Fe-N-CNBs-600                            | 6.0 M KOH                              | 1.53                       | 257                                 | 25       |
| Ni-Fe-MoN NTs                            | 6.0 M KOH + 0.2 M Zn(Ac) <sub>2</sub>  | 1.35                       | 118                                 | 26       |
| Co-MOF                                   | 6.0 M KOH + 0.2 M Zn(Ac) <sub>2</sub>  | 1.33                       | 86                                  | 27       |
| NiCo <sub>2</sub> O <sub>4</sub> @N-OCNT | 6.0 M KOH + 0.2 M Zn(OAc) <sub>2</sub> | 1.40                       | 50                                  | 28       |
| FeNC-S-Fe <sub>x</sub> C/Fe              | 6.0 M KOH + 0.02 M Zn(Ac) <sub>2</sub> | 1.41                       | 149                                 | 29       |
| Co/Co <sub>3</sub> O <sub>4</sub> @PGS   | 6.0 M KOH + 0.2 M Zn(Ac) <sub>2</sub>  | 1.45                       | 118                                 | 30       |

**Table S3.** Comparison of the performances of solid-like ZABs our work and other recently reported catalysts.

| Catalysts              | Electrolyte | Open-circuit Voltage (V) | Power density (mW/cm <sup>2</sup> ) | Ref.     |
|------------------------|-------------|--------------------------|-------------------------------------|----------|
| Pt/C                   | PVA glue    | 1.48                     | 92.8                                | The work |
| CuCo@N-C               | PVA glue    | 1.46                     | 82.9                                | The work |
| CNT@POF                | PVA glue    | 1.39                     | 22.3                                | 31       |
| CoN <sub>4</sub> /NG   | PVA glue    | ~                        | 28.0                                | 32       |
| NC-Co SA               | PVA glue    | 1.41                     | 20.9                                | 33       |
| NC-Co/CoN <sub>x</sub> | ~           | 1.40                     | 41.5                                | 34       |
| CC-AC                  | PVA glue    | 1.37                     | 52.3                                | 35       |
| N,S-CC                 | PVA glue    | 1.25                     | 47                                  | 36       |

## References

- 1 X. Wang, Y. Li, T. Jin, J. Meng, L. Jiao, M. Zhu, J. Chen, Electrospun Thin-Walled  $\text{CuCo}_2\text{O}_4/\text{C}$  Nanotubes as Bifunctional Oxygen Electrocatalysts for Rechargeable Zn-Air Batteries, *Nano lett.*, 2017, **17**, 7989-7994.
- 2 A. Serov, N. I. Andersen, A. J. Roy, I. Matanovic, K. Artyushkova, P. Atanasov,  $\text{CuCo}_2\text{O}_4$  ORR/OER Bi-Functional Catalyst: Influence of Synthetic Approach on Performance, *J. Electrochem. Soc.*, 2015, **162**, F449-F454.
- 3 X. Li, Y. Fang, X. Lin, M. Tian, X. An, Y. Fu, R. Li, J. Jin, J. Ma, MOF derived  $\text{Co}_3\text{O}_4$  nanoparticles embedded in N-doped mesoporous carbon layer/MWCNT hybrids: extraordinary bi-functional electrocatalysts for OER and ORR, *J. Mater. Chem. A*, 2015, **3**, 17392-17402.
- 4 K. Kumar, C. Canaff, J. Rousseau, S. Arrii-Clacens, T. W. Napporn, A. Habrioux, K. B. Kokoh, Effect of the Oxide–Carbon Heterointerface on the Activity of  $\text{Co}_3\text{O}_4/\text{NRGO}$  Nanocomposites toward ORR and OER, *J. Phy. Chem. C*, 2016, **120**, 7949-7958.
- 5 I. S. Amiinu, X. Liu, Z. Pu, W. Li, Q. Li, J. Zhang, H. Tang, H. Zhang, S. Mu, From 3D ZIF Nanocrystals to  $\text{Co-N}_x/\text{C}$  Nanorod Array Electrocatalysts for ORR, OER, and Zn-Air Batteries, *Adv. Funct. Mater.*, 2018, **28**, 1704638.
- 6 J. Li, G. Liu, B. Liu, Z. Min, D. Qian, J. Jiang, J. Li, An extremely facile route to  $\text{Co}_2\text{P}$  encased in N,P-codoped carbon layers: Highly efficient bifunctional electrocatalysts for ORR and OER, *Int. J. Hydrogen Energy*, 2018, **43**, 1365-1374.
- 7 J. Su, G. Xia, R. Li, Y. Yang, J. Chen, R. Shi, P. Jiang, Q. Chen,  $\text{Co}_3\text{ZnC}/\text{Co}$  nano heterojunctions encapsulated in N-doped graphene layers derived from PBAs as highly efficient bi-functional OER and ORR electrocatalysts, *J. Mater. Chem. A*, 2016, **4**, 9204-9212.
- 8 L. Yu, H. Zhou, J. Sun, F. Qin, D. Luo, L. Xie, F. Yu, J. Bao, Y. Li, Y. Yu, S. Chen, Z. Ren, Hierarchical  $\text{Cu}@\text{CoFe}$  layered double hydroxide core-shell nanoarchitectures as bifunctional electrocatalysts for efficient overall water splitting, *Nano Energy*, 2017, **41**, 327-336.
- 9 A. Aijaz, J. Masa, C. Rosler, W. Xia, P. Weide, A. J. Botz, R. A. Fischer, W. Schuhmann, M. Muhler,  $\text{Co}@\text{Co}_3\text{O}_4$  Encapsulated in Carbon Nanotube-Grafted Nitrogen-Doped Carbon Polyhedra as an Advanced Bifunctional Oxygen Electrode, *Angew. Chem. Int. Ed.*, 2016, **55**, 4087-4091.
- 10 N. Ma, Y. Jia, X. Yang, X. She, L. Zhang, Z. Peng, X. Yao, D. Yang, Seaweed biomass derived  $(\text{Ni},\text{Co})/\text{CNT}$  nanoaerogels: efficient bifunctional electrocatalysts for oxygen evolution and reduction reactions, *J. Mater. Chem. A*, 2016, **4**, 6376-6384.
- 11 H. Xu, J.-X. Feng, Y.-X. Tong, G.-R. Li,  $\text{Cu}_2\text{O}-\text{Cu}$  Hybrid Foams as High-Performance Electrocatalysts for Oxygen Evolution Reaction in Alkaline Media, *ACS Catal.*, 2016, **7**, 986-991.
- 12 W. Zhang, X. Yao, S. Zhou, X. Li, L. Li, Z. Yu, L. Gu, ZIF-8/ZIF-67-Derived  $\text{Co-N}_x$ -Embedded 1D Porous Carbon Nanofibers with Graphitic Carbon-Encased Co Nanoparticles as an Efficient Bifunctional Electrocatalyst, *Small*, 2018, **14**,

e1800423.

- 13 X. Li, Q. Jiang, S. Dou, L. Deng, J. Huo, S. Wang, ZIF-67-derived Co-NC@CoP-NC nanopolyhedra as an efficient bifunctional oxygen electrocatalyst, *J. Mater. Chem. A*, 2018, **4**, 15836-15840.
- 14 G. Fu, J. Wang, Y. Chen, Y. Liu, Y. Tang, J. B. Goodenough, J. M. Lee, Exploring Indium-Based Ternary Thiospinel as Conceivable High-Potential Air-Cathode for Rechargeable Zn-Air Batteries, *Adv. Energy Mater.*, 2018, **8**, 1802263.
- 15 Q. Wang, Y. Lei, Z. Chen, N. Wu, Y. Wang, B. Wang, Y. Wang, Fe/Fe<sub>3</sub>C@C nanoparticles encapsulated in N-doped graphene-CNTs framework as an efficient bifunctional oxygen electrocatalyst for robust rechargeable Zn-air batteries, *J. Mater. Chem. A*, 2018, **6**, 516-526.
- 16 S. Han, X. Hu, J. Wang, X. Fang, Y. Zhu, Novel Route to Fe-Based Cathode as an Efficient Bifunctional Catalysts for Rechargeable Zn-Air Battery, *Adv. Energy Mater.*, 2018, **8**, 1800955.
- 17 X. Liu, L. Wang, P. Yu, C. Tian, F. Sun, J. Ma, W. Li, H. Fu, A Stable Bifunctional Catalyst for Rechargeable Zinc-Air Batteries: Iron-Cobalt Nanoparticles Embedded in a Nitrogen-Doped 3D Carbon Matrix, *Angew. Chem. Int. Ed.*, 2018, **57**, 16166-16170.
- 18 L. Kuai, E. Kan, W. Cao, M. Huttula, S. Ollikkala, T. Ahopelto, A.-P. Honkanen, S. Huotari, W. Wang, B. Geng, Mesoporous LaMnO<sub>3</sub>+ $\delta$  perovskite from spray-pyrolysis with superior performance for oxygen reduction reaction and Zn-air battery, *Nano Energy*, 2018, **43**, 81-90.
- 19 H. Luo, W.-J. Jiang, Y. Zhang, S. Niu, T. Tang, L.-B. Huang, Y.-Y. Chen, Z. Wei, J.-S. Hu, Self-terminated activation for high-yield production of N,P-codoped nanoporous carbon as an efficient metal-free electrocatalyst for Zn-air battery. *Carbon*, 2018, **128**, 97-105.
- 20 V. Kashyap, S. Kurungot, Zirconium-Substituted Cobalt Ferrite Nanoparticle Supported N-doped Reduced Graphene Oxide as an Efficient Bifunctional Electrocatalyst for Rechargeable Zn-Air Battery, *ACS Catal.*, 2018, **8**, 3715-3726.
- 21 C. Lai, J. Wang, W. Lei, C. Xuan, W. Xiao, T. Zhao, T. Huang, L. Chen, Y. Zhu, D. Wang, Restricting Growth of Ni<sub>3</sub>Fe Nanoparticles on Heteroatom-Doped Carbon Nanotube/Graphene Nanosheets as Air-Electrode Electrocatalyst for Zn-Air Battery, *ACS Appl. Mater. Interfaces*, 2018, **10**, 38093-38100.
- 22 L. Yang, X. Zeng, D. Wang, D. Cao, Biomass-derived FeNi alloy and nitrogen-codoped porous carbons as highly efficient oxygen reduction and evolution bifunctional electrocatalysts for rechargeable Zn-air battery, *Energy Storage Mater.*, 2018, **12**, 277-283.
- 23 H. Yang, B. Wang, H. Li, B. Ni, K. Wang, Q. Zhang, X. Wang, Trimetallic Sulfide Mesoporous Nanospheres as Superior Electrocatalysts for Rechargeable Zn-Air Batteries, *Adv. Energy Mater.*, 2018, **8**, 1801839.
- 24 F. Kong, X. Fan, A. Kong, Z. Zhou, X. Zhang, Y. Shan, Covalent Phenanthroline Framework Derived FeS@Fe<sub>3</sub>C Composite Nanoparticles Embedding in N-S-Codoped Carbons as Highly Efficient Trifunctional Electrocatalysts, *Adv. Funct. Mater.*, 2018, **28**, 1803973.

- 25 L. Cao, Z.-h Li, Y. Gu, D.-h Li, K.-m. Su, D.-j. Yang, B.-w. Cheng, Rational design of N-doped carbon nanobox-supported Fe/Fe<sub>2</sub>N/Fe<sub>3</sub>C nanoparticles as efficient oxygen reduction catalysts for Zn–air batteries, *J. Mater. Chem. A*, 2017, **5**, 11340-11347.
- 26 C. Zhu, Z. Yin, W. Lai, Y. Sun, L. Liu, X. Zhang, Y. Chen, S.-L. Chou, Fe-Ni-Mo Nitride Porous Nanotubes for Full Water Splitting and Zn-Air Batteries, *Adv. Energy Mater.*, 2018, **8**, 1802327.
- 27 G. Chen, J. Zhang, F. Wang, L. Wang, Z. Liao, E. Zschech, K. Mullen, X. Feng, Cobalt-Based Metal-Organic Framework Nanoarrays as Bifunctional Oxygen Electrocatalysts for Rechargeable Zn-Air Batteries, *Chemistry-A European J.*, 2018, **24**, 18413-18418.
- 28 S. Zeng, X. Tong, S. Zhou, B. Lv, J. Qiao, Y. Song, M. Chen, J. Di, Q. Li, All-in-One Bifunctional Oxygen Electrode Films for Flexible Zn-Air Batteries, *Small*, 2018, **14**, e1803409.
- 29 Y. Qiao, P. Yuan, Y. Hu, J. Zhang, S. Mu, J. Zhou, H. Li, H. Xia, J. He, Q. Xu, Sulfuration of an Fe-N-C Catalyst Containing Fe<sub>x</sub>C/Fe Species to Enhance the Catalysis of Oxygen Reduction in Acidic Media and for Use in Flexible Zn-Air Batteries, *Adv. Mater.*, 2018, **30**, e1804504.
- 30 Y. Jiang, Y.-P. Deng, J. Fu, D. U. Lee, R. Liang, Z. P. Cano, Y. Liu, Z. Bai, S. Hwang, L. Yang, D. Su, W. Chu, Z. Chen, Interpenetrating Triphase Cobalt-Based Nanocomposites as Efficient Bifunctional Oxygen Electrocatalysts for Long-Lasting Rechargeable Zn-Air Batteries, *Adv. Energy Mater.*, 2018, **8**, 1702900.
- 31 B. Q. Li, S. Y. Zhang, B. Wang, Z. J. Xia, C. Tang, Q. A. Zhang, Porphyrin covalent organic framework cathode for flexible Zn-air batteries, *Energy Environ. Sci.*, 2018, **11**, 1723-1729.
- 32 L. Yang, L. Shi, D. Wang, Y. Lv, D. Cao, Single-atom cobalt electrocatalysts for foldable solid-state Zn-air battery, *Nano Energy*, 2018, **50**, 691-698.
- 33 W. Zang, A. Sumboja, Y. Ma, H. Zhang, Y. Wu, S. Wu, H. Wu, Z. Liu, C. Guan, J. Wang, S. J. Pennycook, Single Co Atoms Anchored in Porous N-Doped Carbon for Efficient Zinc–Air Battery Cathodes, *ACS Catal.*, 2018, **8**, 8961-8969.
- 34 C. Guan, A. Sumboja, W. Zang, Y. Qian, H. Zhang, X. Liu, Z. Liu, D. Zhao, S. J. Pennycook, J. Wang, Decorating Co/CoN<sub>x</sub> nanoparticles in nitrogen-doped carbon nanoarrays for flexible and rechargeable zinc-air batteries, *Energy Storage Mater.*, 2019, **16**, 243-250.
- 35 K. Kordek, L. Jiang, K. Fan, Z. Zhu, L. Xu, M. Mamun, Y. Dou, S. Chen, P. Liu, H. Yin, P. Rutkowski, H. Zhao, Two-Step Activated Carbon Cloth with Oxygen-Rich Functional Groups as a High-Performance Additive-Free Air Electrode for Flexible Zinc-Air Batteries, *Adv. Energy Mater.*, 2018, 1802936.
- 36 Z. Zhao, Z. Yuan, Z. Fang, J. Jian, J. Li, M. Yang, C. Mo, Y. Zhang, X. Hu, P. Li, S. Wang, W. Hong, Z. Zheng, G. Ouyang, X. Chen, D. Yu, In Situ Activating Strategy to Significantly Boost Oxygen Electrocatalysis of Commercial Carbon Cloth for Flexible and Rechargeable Zn-Air Batteries, *Adv. Sci.*, 2018, **5**, 1800760.
